# Supplementary material for: Pushing the temporal resolution in absorption and Zernike phase contrast nanotomography: enabling fast in situ experiments
Source: PubMed Central journal article supplement (PMC7467338; doi:10.1107/s1600577520007407), 2020-07-30
Supplement: s-27-01339-sup1.pdf [file s-27-01339-sup1.pdf]

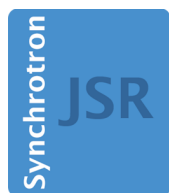

JOURNAL OF  
SYNCHROTRON  
RADIATION

**Volume 27 (2020)**

**Supporting information for article:**

**Pushing the temporal resolution in absorption and Zernike phase-contrast nanotomography: enabling fast in situ experiments**

**Silja Flenner, Malte Storm, Adam Kubec, Elena Longo, Florian Döring, Daniël M. Pelt, Christian David, Martin Müller and Imke Greving**

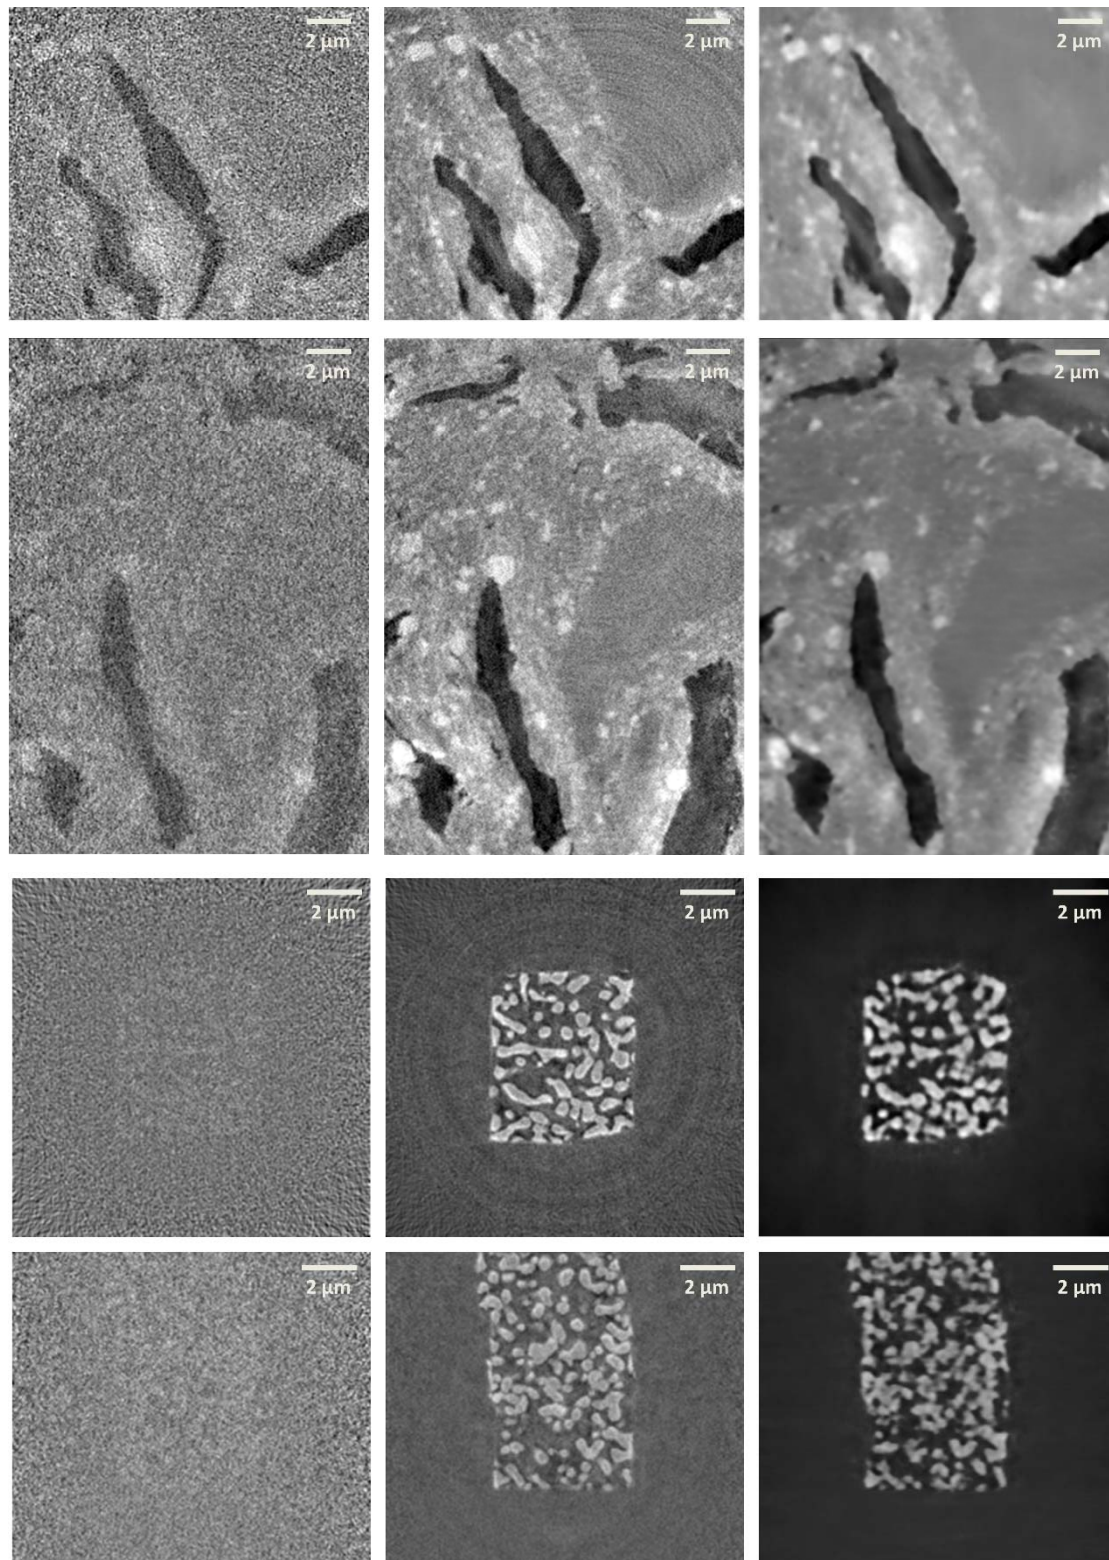

**Figure S1** Upper row: input (left), target (middle) and network output of the machine learning with msdnet (Pelt *et al.*, 2018; Pelt & Sethian, 2018). The training was performed in the xy-plane. Lower row: xz- view of the corresponding dataset.

**Table S1** Measured performance parameters of the air bearing rotation stage (Pi Micos), custom design.

| Type of Error | Error $\sigma$  |
|---------------|-----------------|
| Axial error   | 16.92 nm        |
| Radial error  | 21.43 nm        |
| Tilt $R_x$    | 0.223 $\mu$ rad |
| Tilt $R_y$    | 0.190 $\mu$ rad |

**Table S2** Material parameter of the test samples. The real part of the refractive index  $\delta$  describes a sample induced phase shift and  $\beta$  the extinction.  $\beta$  and  $\delta$  are given for an energy of 11 keV.

| Material | $\beta$ [11keV]     | $\delta$ [11keV]     | Density g/cm <sup>3</sup> |
|----------|---------------------|----------------------|---------------------------|
| NPG      | $2.4 \cdot 10^{-6}$ | $1.5 \cdot 10^{-5}$  | 19.3                      |
| Mg       | $2.4 \cdot 10^{-8}$ | $2.9 \cdot 10^{-6}$  | 1.7                       |
| SiC      | $4.8 \cdot 10^{-8}$ | $5.46 \cdot 10^{-6}$ | 3.2                       |

**Table S3** Parameters of the CNR fits  $a \left(1 - \exp\left(-\frac{\sqrt{E}}{b}\right)\right)$  displayed in Figure 4.

|                  | a   | b    |
|------------------|-----|------|
| NPG (absorption) | 4.7 | 11.6 |
| Mg – air         | 1.4 | 8.4  |
| Si C– air        | 3.8 | 10.9 |
| SiC – Mg         | 3.7 | 20.3 |
